# Supplementary material for: COVID-19 in pregnancy: the foetal perspective—a systematic review
Source: PubMed Central journal article supplement — BMJ Paediatr Open. 2020 Nov 25;4(1):e000859. doi: 10.1136/bmjpo-2020-000859 (PMC7689539; doi:10.1136/bmjpo-2020-000859), 2020-11-25
Supplement: bmjpo-2020-000859supp001.pdf [file bmjpo-2020-000859supp001.pdf]

**Table-1 (a): Analysis of the studies [Case series/ Cohort]**

| Serial number | Author (reference)      | Number of pregnancies | Country | Outcomes included                                                                          | Selection Contains diagnosed COVID-19 in Pregnancy | Comparability Data on pregnant women and fetus available | Outcome; Assessment and reporting | Evidence of mother to child transmission | Perinatal Outcome |
|---------------|-------------------------|-----------------------|---------|--------------------------------------------------------------------------------------------|----------------------------------------------------|----------------------------------------------------------|-----------------------------------|------------------------------------------|-------------------|
| 1.            | Chen H et al (45)       | 9                     | China   | Symptoms, maternal characteristics, laboratory parameters, pregnancy and neonatal outcomes | ****                                               | **                                                       | ***                               | √                                        | √                 |
| 2.            | Zeng H et al (54)       | 6                     | China   | Symptoms, maternal characteristics, laboratory parameters, pregnancy and neonatal outcomes | ****                                               | **                                                       | ***                               | √                                        | √                 |
| 3.            | Zhu H et al (57)        | 10                    | China   | Symptoms, maternal characteristics, laboratory parameters, pregnancy and neonatal outcomes | ****                                               | **                                                       | ***                               | √                                        | √                 |
| 4.            | Zhang I et al (102)     | 61                    | China   | Symptoms, maternal characteristics, laboratory parameters, pregnancy and neonatal outcomes | ****                                               | **                                                       | ***                               | √                                        | √                 |
| 5.            | Penfield CA et al (103) | 11                    | China   | Placental, membrane and neonatal samples                                                   | ****                                               |                                                          | **                                | √                                        |                   |
| 6.            | Liu Y et al (69)        | 10                    | China   | Symptoms, maternal characteristics, laboratory parameters, pregnancy and neonatal outcomes | ****                                               | **                                                       | ***                               | √                                        | √                 |
| 7.            | Khan S et al (64)       | 17                    | China   | Symptoms, maternal characteristics, pregnancy and neonatal outcomes                        | ****                                               | **                                                       | ***                               | √                                        | √                 |
| 8.            | Zeng L et al (41)       | 33                    | China   | Symptoms, maternal characteristics, laboratory parameters, pregnancy and neonatal outcomes | ****                                               | **                                                       | ***                               | √                                        | √                 |
| 9.            | Qiancheng X et al (107) | 23                    | China   | Symptoms, maternal characteristics, laboratory parameters, pregnancy and neonatal outcomes | ****                                               | **                                                       | ***                               | √                                        | √                 |
| 10.           | Yang P et al (81)       | 7                     | China   | Symptoms, maternal characteristics, laboratory parameters, pregnancy and neonatal outcomes | ****                                               | **                                                       | ***                               | √                                        | √                 |
| 11.           | Yang H et al (73)       | 55                    | China   | Symptoms, maternal characteristics, laboratory parameters, pregnancy and neonatal outcomes | ****                                               | *                                                        | *                                 | √                                        | √                 |

|     |                          |     |       |                                                                                            |      |    |     |   |   |
|-----|--------------------------|-----|-------|--------------------------------------------------------------------------------------------|------|----|-----|---|---|
| 12. | Wu Y et al (47)          | 13  | China | Symptoms, maternal characteristics, laboratory parameters, pregnancy outcomes              | **** | *  | *   | √ |   |
| 13. | Yan J et al (24)         | 116 | China | pregnancy and neonatal outcomes                                                            | **** | ** | *** |   | √ |
| 14. | Li N et al (66)          | 16  | China | Symptoms, maternal outcomes, neonatal outcomes                                             | **** | ** | *** |   | √ |
| 15. | Cao D et al (67)         | 10  | China | Symptoms, maternal characteristics, laboratory parameters, pregnancy outcomes              | **** | ** | *** | √ | √ |
| 16. | Yin M et al (46)         | 31  | China | Symptoms, maternal characteristics, laboratory parameters, pregnancy outcomes              | **** | ** | *** | √ | √ |
| 17. | Hu X et al (42)          | 7   | China | Symptoms, maternal characteristics, laboratory parameters, pregnancy outcomes              | **** | ** | *** | √ | √ |
| 18. | Nie R et al (68)         | 33  | China | Symptoms, maternal characteristics, laboratory parameters, pregnancy outcomes              | **** | ** | *** | √ | √ |
| 19. | Patane L et al (39)      | 22  | Italy | Symptoms, maternal characteristics, laboratory parameters, pregnancy and neonatal outcomes | **** | ** | *** | √ | √ |
| 20. | Ferrazzi E et al (28)    | 42  | Italy | Symptoms, maternal characteristics, laboratory parameters, pregnancy and neonatal outcomes | **** | ** | *** | √ | √ |
| 21. | Savasi V et al (109)     | 77  | Italy | Symptoms, maternal characteristics, laboratory parameters, pregnancy and neonatal outcomes | **** | ** | *** | √ | √ |
| 22. | Mulvey J et al (38)      | 5   | US    | Placental characteristics                                                                  | ***  |    |     | √ |   |
| 23. | Vintzileos W et al (113) | 32  | US    | Symptoms, maternal characteristics, Test results                                           | ***  | *  | *** | √ |   |
| 24. | Breslin N et al (59)     | 18  | US    | Symptoms, maternal characteristics, laboratory parameters, pregnancy and neonatal outcomes | **** | ** | *** | √ | √ |
| 25. | Baergen R et al (37)     | 20  | US    | Maternal characteristics, maternal outcomes, Placental characteristics                     | ***  |    |     | √ |   |

|     |                          |     |        |                                                                                            |      |    |      |   |   |
|-----|--------------------------|-----|--------|--------------------------------------------------------------------------------------------|------|----|------|---|---|
| 26. | Williams R et al (63)    | 64  | US     | Maternal characteristics, pregnancy and neonatal outcomes                                  | **** | ** | ***  | √ | √ |
| 27. | Shanes E et al (36)      | 16  | US     | Symptoms, maternal characteristics, Placental pathology, pregnancy and neonatal outcomes   | **** | ** | ***  | √ | √ |
| 28. | Breslin N et al (114)    | 7   | US     | Symptoms, maternal characteristics, test result                                            | **   | ** | **   | √ |   |
| 29. | London V et al (27)      | 68  | US     | Symptoms, maternal characteristics, laboratory parameters, pregnancy and neonatal outcomes | **** | ** | ***  | √ | √ |
| 30. | Lokken E et al (40)      | 46  | US     | Symptoms, maternal characteristics, laboratory parameters, pregnancy outcomes              | **** | ** | ***  |   | √ |
| 31. | Qadri F et al (115)      | 16  | US     | Maternal characteristics, laboratory parameters, pregnancy and neonatal outcomes           | **** | ** | -.** |   | √ |
| 32. | Prabhu M et al (60)      | 70  | US     | Symptoms, obstetric and neonatal outcomes, and placental pathology                         | **** | ** | ***  | √ | √ |
| 33. | Romagano M et al (82)    | 7   | US     | Symptoms, maternal characteristics, laboratory parameters, pregnancy outcomes              | **** | ** | *    |   | √ |
| 34. | Govind A et al (61)      | 9   | UK     | Symptoms, maternal characteristics, laboratory parameters, pregnancy and neonatal outcomes | **** | ** | ***  | √ | √ |
| 35. | Knight M et al (23)      | 427 | UK     | Symptoms, maternal characteristics, pregnancy and neonatal outcomes                        | **** | ** | ***  | √ | √ |
| 36. | Sentilhes, et al (116)   | 38  | France | Symptoms, maternal outcomes, neonatal outcomes                                             | **** | ** | ***  | √ | √ |
| 37. | Kayem G et al (25)       | 617 | France | Symptoms, maternal characteristics, pregnancy and neonatal outcomes                        | **** | ** | ***  | √ | √ |
| 38. | Nayak A et al (26)       | 141 | India  | Symptoms, maternal outcomes, neonatal outcomes                                             | **** | ** | ***  |   | √ |
| 39. | Hantoushzadeh et al (75) | 7   | Iran   | Symptoms, maternal characteristics, laboratory parameters, pregnancy and neonatal outcomes | **** | ** | ***  | √ | √ |

|     |                    |    |          |                                                        |      |    |    |   |   |
|-----|--------------------|----|----------|--------------------------------------------------------|------|----|----|---|---|
| 40. | Perez O et al (65) | 82 | Spain    | Symptoms, maternal characteristics, pregnancy outcomes | **** | ** | ** | √ | √ |
| 41. | Doria M et al (48) | 10 | Portugal | Symptoms, maternal characteristics, pregnancy outcomes | **** | ** | *  |   | √ |

**Table-1 (b): Analysis of the studies [Case reports]**

| Serial number | Author (reference)  | Number of pregnancies | Country | Outcomes included                                                                          | Selection Contains diagnosed COVID-19 in Pregnancy | Comparability Data on pregnant women and fetus available | Outcome; Assessment and reporting | Evidence of vertical transmission | Perinatal Outcome |
|---------------|---------------------|-----------------------|---------|--------------------------------------------------------------------------------------------|----------------------------------------------------|----------------------------------------------------------|-----------------------------------|-----------------------------------|-------------------|
| 1.            | Alzamora et al (78) | 1                     | China   | Symptoms, maternal characteristics, laboratory parameters, pregnancy and neonatal outcomes | ****                                               | **                                                       | ***                               | √                                 | √                 |
| 2.            | Li Y et al (44)     | 1                     | China   | Symptoms, maternal characteristics, laboratory parameters, pregnancy and neonatal outcomes | ****                                               | **                                                       | ***                               | √                                 | √                 |
| 3.            | Dong L et al (55)   | 1                     | China   | Symptoms, maternal characteristics, laboratory parameters, pregnancy and neonatal outcomes | ****                                               | **                                                       | ***                               | √                                 | √                 |
| 4.            | Liao X et al (106)  | 1                     | China   | Symptoms, maternal characteristics, pregnancy outcomes                                     | ****                                               | **                                                       | ***                               | √                                 | √                 |
| 5.            | Wang X et al (77)   | 1                     | China   | Symptoms, maternal characteristics, laboratory parameters, pregnancy and neonatal outcomes | ****                                               | **                                                       | ***                               | √                                 | √                 |
| 6.            | Huang J et al (86)  | 1                     | China   | Symptoms, maternal characteristics, pregnancy outcomes                                     | ****                                               | **                                                       | ***                               | √                                 | √                 |
| 7.            | Xiong X et al (50)  | 1                     | China   | Symptoms, maternal characteristics, pregnancy and neonatal outcomes                        | ****                                               | **                                                       | ***                               | √                                 | √                 |
| 8.            | Wang S et al (51)   | 1                     | China   | Symptoms, maternal characteristics, pregnancy and neonatal outcomes                        | ****                                               | **                                                       | ***                               | √                                 | √                 |
| 9.            | Song L et al (49)   | 1                     | China   | Symptoms, maternal characteristics, laboratory parameters, pregnancy and neonatal outcome  | ****                                               | **                                                       | ***                               | √                                 | √                 |
| 10.           | Fan C et al (48)    | 2                     | China   | Symptoms, maternal characteristics, laboratory parameters, pregnancy and neonatal outcomes | ****                                               | **                                                       | ***                               | √                                 | √                 |

|     |                          |   |        |                                                                                            |      |    |     |   |   |
|-----|--------------------------|---|--------|--------------------------------------------------------------------------------------------|------|----|-----|---|---|
| 11. | Chen Y et al (58)        | 4 | China  | Symptoms, maternal characteristics, laboratory parameters, pregnancy and neonatal outcomes | **** | ** | *** | √ | √ |
| 12. | Peng Z et al(43)         | 1 | China  | Symptoms, maternal characteristics, laboratory parameters, pregnancy and neonatal outcomes | **** | ** | *** | √ | √ |
| 13. | Liu W et al (56)         | 3 | China  | Symptoms, maternal characteristics, laboratory parameters, pregnancy and neonatal outcomes | **** | ** | *** | √ | √ |
| 14. | Chen S et al (104)       | 3 | China  | Symptoms, laboratory parameters, pregnancy outcomes, samples                               | **** | ** | *** | √ | √ |
| 15. | Khan S et al (85)        | 3 | China  | Symptoms, maternal characteristics, pregnancy and neonatal outcomes                        | **** | ** | *** | √ | √ |
| 16. | Yu N et al (108)         | 2 | China  | Symptoms, maternal characteristics, amniotic fluid in mid pregnancy                        | **** | *  | *   | √ |   |
| 17. | Schnettler W et al (110) | 1 | US     | Symptoms, maternal characteristics, laboratory parameters, pregnancy outcome               | **** | ** | **  | √ |   |
| 18. | Blauvelt C et al (84)    | 1 | US     | Symptoms, maternal characteristics, laboratory parameters, pregnancy and neonatal outcome  | **** | ** | *** | √ | √ |
| 19. | Iqbal S et al (105)      | 1 | US     | Symptoms, maternal characteristics, pregnancy outcomes                                     | **** | ** | *** | √ | √ |
| 20. | Algorroba et al (34)     | 1 | US     | Symptoms, maternal characteristics, laboratory parameters, pregnancy outcome               | ***  | *  | *   | √ |   |
| 21. | Hosier H et al(32)       | 1 | US     | Symptoms, maternal characteristics, test result                                            | **** | ** | **  | √ |   |
| 22. | Sisman J et al (70)      | 1 | US     | Symptoms, maternal characteristics, pregnancy outcomes                                     | **** | ** | *** | √ | √ |
| 23. | Kalafat E et al (79)     | 1 | Turkey | Symptoms, maternal characteristics, pregnancy and neonatal outcomes                        | **** | ** | *** | √ | √ |
| 24. | Kirtsman M et al (35)    | 1 | Canada | Symptoms, maternal characteristics, laboratory parameters, pregnancy and neonatal outcome  | **** | ** | *** | √ | √ |

|     |                         |   |                 |                                                                                            |      |    |     |   |   |
|-----|-------------------------|---|-----------------|--------------------------------------------------------------------------------------------|------|----|-----|---|---|
| 25. | Lyra J et al (74)       | 1 | Portugal        | Symptoms, maternal characteristics, laboratory parameters, pregnancy and neonatal outcome  | **** | ** | *** | √ | √ |
| 26. | Buonsenso et al (53)    | 4 | Italy           | Symptoms, maternal findings, test results                                                  | **** | *  | **  | √ |   |
| 27. | Perrone S et al (72)    | 4 | Italy           | Symptoms, maternal characteristics, laboratory parameters, pregnancy and neonatal outcomes | **** | ** | *** | √ | √ |
| 28. | Buonsenso D et al (112) | 2 | Italy           | Maternal characteristics, Samples for detection                                            | **** | ** | *   | √ |   |
| 29. | Groß R et al (52)       | 2 | Germany         | Symptoms, maternal findings, test results                                                  | **** | *  | *   | √ |   |
| 30. | Cooke W et al (83)      | 2 | UK              | Symptoms, maternal characteristics, laboratory parameters, pregnancy and neonatal outcomes | **** | ** | -** |   | √ |
| 31. | Pulinx B et al (31)     | 2 | Belgium         | Symptoms, maternal characteristics, laboratory parameters, second trimester miscarriage    | **** | *  | *   | √ |   |
| 32. | Lee D et al (80)        | 1 | Korea           | Symptoms, maternal characteristics, pregnancy and neonatal outcomes                        | **** | ** | *** | √ | √ |
| 33. | Gidlöf S et al (76)     | 2 | Sweden          | Symptoms, maternal characteristics, pregnancy and neonatal outcomes                        | **** | ** | *** | √ | √ |
| 34. | Baud D et al (33)       | 1 | Switzerland     | Symptoms, maternal characteristics, laboratory parameters, second trimester miscarriage    | **** | *  | *   | √ |   |
| 35. | Zamaniyan M et al (30)  | 1 | Iran            | Symptoms, maternal characteristics, laboratory parameters, pregnancy and neonatal outcomes | **** | ** | *** | √ | √ |
| 36. | Zambrano L et al (87)   | 1 | Central America | Symptoms, maternal characteristics, laboratory parameters, pregnancy and neonatal outcome  | **** | ** | *** | √ | √ |
| 37. | Vivanti A et al (29)    | 1 | France          | Symptoms, maternal outcomes, neonatal outcomes                                             | **** | ** | *** | √ | √ |
| 38. | Lowe B et al (62)       | 1 | Australia       | Symptoms, maternal characteristics, laboratory parameters, pregnancy and neonatal outcome  | **** | ** | *** | √ | √ |

|     |                      |   |       |                                                                                           |      |    |     |   |   |
|-----|----------------------|---|-------|-------------------------------------------------------------------------------------------|------|----|-----|---|---|
| 39. | Kulkarni et al (117) | 1 | India | Symptoms, maternal characteristics, laboratory parameters, pregnancy and neonatal outcome | **** | ** | *** | √ | √ |
|-----|----------------------|---|-------|-------------------------------------------------------------------------------------------|------|----|-----|---|---|

**Selection**- \* Representativeness of the patients \*Ascertained exposure to SARS-CoV-2 \*Ascertained outcome- Symptoms of COVID-19 in the mother \* Ruling out other causes- Test result of mother positive [\*\*\*\*-Contains all 4 components; \*\*\*-Contains first 3 out of 4 components; \*\*-Contains first 2 out of 4 components; \*- Contains first 1 out of 4 components]

**Comparability**- Data on both mother and fetus available [\*\*- Both maternal and fetal data available; \*- Only maternal data available ]

**Outcome**- \* Evidence of mother to fetal/neonatal transmission, \* Evidence of Fetal outcome, \*Evidence of neonatal outcome [\*\*\*-Contains all 3 components; \*\*- Contains first 2 out of 3 components; \*- Contains first 1 out of 3 components]

√- Included in analysis of mother to fetal/neonatal transmission or included in analysis of perinatal outcome or both
